# Supplementary material for: Two models to estimate the density of organic cocrystals
Source: Royal Society of Chemistry journal article supplement (doi:10.1039/d0ra10241e), 2021-01-01
Supplement: d0ra10241e1.pdf [file d0ra10241e1.pdf]

## Two models to estimation the density of organiccocrystals

Jun-Hong Zhou<sup>a\*</sup>, Li Zhao<sup>b</sup>, Liang-Wei Shi<sup>c</sup>, Pei-Cheng Luo<sup>b\*</sup>

a Department of computer chemistry and cheminformatics, Shanghai Institute of Organic Chemistry, Chinese Academy of Science, 345 Lingling Road, Shanghai, 200032, China.

b School of Chemistry & Chemical Engineering Southeast University, 211189 Nanjing, China

c CAS Key Laboratory of Energy Regulation Materials, Chinese Academy of Sciences, 345 Lingling Road, Shanghai, 200032, China.

Email Address: zhoujh8@sioc.ac.cn; luopeicheng@seu.edu.cn

Table S1 the systematic name of the components of the cocrystals

| abbreviate | Systematic name                                              |
|------------|--------------------------------------------------------------|
| CL-20      | 2,4,6,8,10,12-hexanitro-2,4,6,8,10,12-hexaazaisowurtzitane   |
| TNT        | 2,4,6-trinitrotoluene                                        |
| DNG        | 3,5-dinitro-3,5-diazaheptane                                 |
| MTNP       | 1-methyl-3,4,5-trinitro-1H-pyrazole                          |
| AZ2        | tris[1,2,5]oxadiazolo[3,4-b:3',4'-d:3'',4''-f]azepin-7-amine |
| NEX-1      | 1-methyl-3,5-dinitro-1,2,4-triazole                          |
| GTA        | propane-1,2,3-triyl triacetate                               |
| TODAAZ     | 7H-tris[1,2,5]oxadiazolo[3,4-b:3',4'-d:3'',4''-f]azepine     |
| NFQN       | 1,4-Naphthoquinone                                           |
| BQN        | b-benzoquinone                                               |
| DNB        | 1,3-dinitrobenzene                                           |
| DNDAP      | N,N'-dimethyl-N,N'-dinitromethanediamine                     |
| 4,5-MDNI   | 1-methyl-4,5-dinitro-1H-imidazole                            |
| HMX        | 1,3,5,7-Tetranitro-1,3,5,7-tetra-azacyclo-octane             |
| FA         | 4-fluoroaniline                                              |
| DAT        | 4-methylbenzene-1,3-diamine                                  |
| NMP        | N-methyl-2-pyrrolidinone                                     |
| PDCA       | piperazine-1,4-dicarbaldehyde                                |
| PNO        | pyridine N-oxide                                             |

|        |                                                        |
|--------|--------------------------------------------------------|
| BTF    | benzotrifuroxan                                        |
| TNB    | 1,3,5-trinitrobenzene                                  |
| MATNB  | N-methyl-2,4,6-trinitroaniline                         |
| TNAZ   | 1,3,3-trinitroazetidine                                |
| TNA    | 2,4,6-trinitroaniline                                  |
| TNT    | 2,4,6-trinitrotoluene                                  |
| NNAP   | 2-Methyl-1,3,5-trinitrobenzene 1-nitronaphthalene      |
| 1-BN   | 1-bromonaphthalene                                     |
| Ant    | anthracene                                             |
| 9-BN   | 9-bromoanthracene                                      |
| Per    | perylene                                               |
| T2     | thieno[3,2-b]thiophene                                 |
| DMDBT  | 4,6-dimethyldibenzothiophene                           |
| PDA    | 1,2-phenylenediamine                                   |
| DMB    | 1,4-dimethoxybenzene                                   |
| TNB    | 2-methyl-1,3,5-trinitrobenzene                         |
| ABA    | 2-Aminobenzoic acid                                    |
| PA     | 10H-Phenothiazine                                      |
| NAP    | naphthalene                                            |
| Phe    | phenanthrene                                           |
| TTF    | tetrathiafulvalene                                     |
| EDNA   | N,N'-dinitroethane-1,2-diamine                         |
| BPY    | 4,4'-bipyridine                                        |
| DPYETA | 4,4'-ethane-1,2-diyl dipyridine                        |
| DPYETE | 4,4'-ethene-1,2-diyl dipyridine                        |
| PYDOXD | pyrazine N,N'-dioxide                                  |
| DNDAP  | N,N'-dimethyl-N,N'-dinitromethanedia mine              |
| FTDO   | [1,2,5]oxadiazolo[3,4-e][1,2,3,4]tetrazine 4,6-dioxide |

|                   |                                                       |
|-------------------|-------------------------------------------------------|
| DADP              | 3,3,6,6-tetramethyl-1,2,4,5-tetroxane                 |
| TBTNB             | 1,3,5-Tribromo-2,4,6-trinitrobenzene                  |
| TCTNB             | 1,3,5-Trichloro-2,4,6-trinitrobenzene                 |
| TITNB             | 1,3,5-triiodo-2,4,6-trinitrobenzene                   |
| DNBT              | 5,5'-dinitro-2H,2'H-3,3'-bi-1,2,4-triazole            |
| DZDBT             | 4,4'-diazenediylbis(4H-1,2,4-triazole)                |
| DNPP              | 3,6-dinitro-1,4-dihydropyrazolo[4,3-c]pyrazole        |
| Organic cocrystal |                                                       |
| NNAP              | 1-nitronaphthalene                                    |
| TNP               | 2,4,6-trinitrophenol                                  |
| MACIC             | Methyl 5-amino-4-carbamoyl-1H-imidazole-1-carboxylate |
| TZM               | temozolomide                                          |
| DHDS              | 2,3-dihydroxysuccinate                                |
| TZM               | Temozolomide                                          |
| DNBZA             | 3,5-Dinitrobenzoic acid                               |
| NA                | nicotinic acid                                        |
| MBD               | 3-methylbenzene-1,2-diamine                           |
| MTNB              | 2-methyl-1,3,5-trinitrobenzene                        |
| PM                | 2,4,6(1H,3H,5H)-Pyrimidinetrione                      |
| MC                | Myricetin                                             |
| PC                | piracetam                                             |
| AB                | 1,3,5-tris(4-aminophenyl)benzene                      |
| MTNB              | 2-methyl-1,3,5-trinitrobenzene                        |
| NDT               | 5-Nitro-2,4-dihydro-3H-1,2,4-triazol-3-one            |
| THTZT             | 5,6,7,8-tetrahydrotetrazolo[1,5-b][1,2,4]triazine     |
| IDT               | 1-Isopropyl-3,5-dinitro-1H-1,2,4-triazole             |
| NTZ               | 3-nitro-1H-1,2,4-triazole                             |
| DNBA              | 3,5-Dinitrobenzoic acid 4-(dimethylamino)             |
| BA                | benzoic acid                                          |

|        |                                                          |
|--------|----------------------------------------------------------|
| PZ     | Pyrazine                                                 |
| OA     | oxalic acid                                              |
| TNP    | 2,4,6-Trinitrophenol                                     |
| MDNI   | 1-methyl-2,4-dinitro-1H-imidazole                        |
| DNBA   | 3,5-dinitrobenzoic acid                                  |
| TA     | 4H-1,2,4-triazol-4-amine                                 |
| NMI    | 4-Nitro-5-methoxy-1H-imidazole                           |
| NMI    | 5-nitro-4-methoxy-1H-imidazole                           |
| AN     | Adenine                                                  |
| HP     | hydrogen peroxide                                        |
| NF     | Nitrofurantoin                                           |
| CA     | citric acid                                              |
| NF     | Nitrofurantoin                                           |
| UREA   | urea                                                     |
| NPO    | 4-nitropyridine-N-oxide                                  |
| PA     | picric acid                                              |
| CA     | cyanuric acid                                            |
| PZCX   | Pyrazine-2-carboxamide                                   |
| DHXBED | 3,4-dihydroxycyclo but-3-ene-1,2-dione                   |
| TNP    | 2,4,6-Trinitrophenol                                     |
| TAD    | 1,3,5,7-tetra-azatricyclo[3.3.1.1 <sup>3,7</sup> ]decane |
| IZO    | Imidazolidin-2-one                                       |
|        | 3,4,5-trihydroxybenzoic acid p-Nitropyridine-N-oxide     |
| DLTA   | DL-tartaric acid                                         |
| LTA    | L-tartaric acid                                          |
| DNBZA  | 3,5-dinitrobenzoic acid                                  |
| TZ     | 1H-1,2,3-triazole                                        |
| OA     | oxalic acid                                              |
| PZCX   | pyrazine-2-carboxamide                                   |

|       |                                         |
|-------|-----------------------------------------|
| OA    | oxalic acid                             |
| TZA   | 2H-Tetrazol-2-amine                     |
| NDTZI | N-nitro-1,4-dihydro-5H-tetrazol-5-imine |
| TZTM  | 1,3,5-triazine-2,4,6-triamine           |
| HP    | hydrogen peroxide                       |
| BM    | Benzamide                               |
| TNP   | 2,4,6-trinitrophenol                    |

Table S2 the three input parameters and one output parameter used in ANN model<sup>a</sup>

| No | Co-formers     | Refcode | MS    | RTm    | E1u   | $\Delta E_{hb}$ | $\rho_1$ | $\rho_2$ | $\rho_{exp}$ |
|----|----------------|---------|-------|--------|-------|-----------------|----------|----------|--------------|
| 1  | CL-20:TNT      | IZUZUZ  | 3.830 | 20.000 | 0.479 | -6.229          | 1.916    | 1.564    | 1.911        |
| 2  | CL-20:DNG      | JABYOD  | 3.645 | 18.009 | 0.517 | -15.978         | 1.916    | 1.547    | 1.750        |
| 3  | CL-20:MTNP     | QAPNAZ  | 3.935 | 20.648 | 0.555 | -8.774          | 1.916    | 1.784    | 1.932        |
| 4  | CL-20:AZ2      | TETTAQ  | 3.245 | 20.366 | 0.476 | -11.568         | 1.916    | 1.808    | 1.939        |
| 5  | CL-20:NEX-1    | WEPGEG  | 3.825 | 18.374 | 0.493 | -13.194         | 1.916    | 1.673    | 1.882        |
| 6  | CL-20:GTA      | XAQFUS  | 3.495 | 17.449 | 0.466 | -22.712         | 1.916    | 1.155    | 1.650        |
| 7  | CL-20:TODAAZ   | HIVGAW  | 3.215 | 21.240 | 0.476 | -3.540          | 1.916    | 1.871    | 1.971        |
| 8  | CL-20:NFQN     | ROSMIX  | 3.295 | 17.656 | 0.522 | -17.230         | 1.916    | 1.417    | 1.774        |
| 9  | CL-20:BQN      | ROSMOD  | 3.520 | 16.963 | 0.467 | -12.186         | 1.916    | 1.325    | 1.737        |
| 10 | CL-20:DNB      | TIVJUF  | 3.740 | 18.933 | 0.490 | -10.910         | 1.916    | 1.569    | 1.880        |
| 11 | CL-20:4,5-MDNI | NILCIX  | 3.780 | 19.108 | 0.533 | -21.335         | 1.916    | 1.637    | 1.882        |
| 12 | HMX:PNO        | WEPTAP  | 3.305 | 10.105 | 0.452 | -18.111         | 1.840    | 1.358    | 1.700        |
| 13 | HMX:FA         | ZEZHET  | 3.355 | 7.763  | 0.488 | -1.407          | 1.840    | 1.400    | 1.687        |
| 14 | HMX:PDCA       | ZEZGOC  | 3.295 | 8.035  | 0.444 | -13.482         | 1.840    | 1.400    | 1.630        |
| 15 | BTF:TNA        | ZEVNUL  | 3.655 | 17.002 | 0.475 | -1.661          | 1.862    | 1.901    | 1.811        |
| 16 | BTF:TNB        | GEXMED  | 3.535 | 17.199 | 0.485 | -3.752          | 1.676    | 1.901    | 1.806        |
| 17 | BTF:MATNB      | GEXMON  | 3.430 | 16.290 | 0.489 | -3.122          | 1.643    | 1.901    | 1.804        |
| 18 | BTF:TNA        | GEXMIH  | 3.530 | 17.271 | 0.484 | -3.573          | 1.773    | 1.901    | 1.884        |

|    |           |          |       |        |       |         |       |       |       |
|----|-----------|----------|-------|--------|-------|---------|-------|-------|-------|
| 19 | TNT: NNAP | TOZMUS   | 3.295 | 12.456 | 0.497 | -10.948 | 1.564 | 1.564 | 1.539 |
| 20 | TNT:1-BN  | URIJAH   | 2.940 | 14.478 | 0.494 | -3.000  | 1.564 | 1.480 | 1.737 |
| 21 | TNT:Ant   | URIJEL   | 2.900 | 11.298 | 0.493 | -3.156  | 1.564 | 1.240 | 1.515 |
| 22 | TNT:9-BN  | URIJIP   | 2.920 | 13.754 | 0.493 | -3.079  | 1.564 | 1.592 | 1.688 |
| 23 | TNT:Per   | URIJUB   | 2.830 | 9.067  | 0.529 | -3.070  | 1.564 | 1.311 | 1.531 |
| 24 | TNT:T2    | URIKEM   | 2.890 | 13.508 | 0.501 | -3.626  | 1.564 | 1.542 | 1.677 |
| 25 | TNT:DMDBT | URIKUC   | 2.880 | 10.555 | 0.540 | -3.469  | 1.564 | 1.299 | 1.496 |
| 26 | TNT:PDA   | URILAJ   | 3.160 | 9.832  | 0.509 | -5.745  | 1.564 | 1.214 | 1.578 |
| 27 | TNT:DMB   | URILEN   | 3.065 | 9.944  | 0.475 | -9.987  | 1.564 | 1.231 | 1.501 |
| 28 | TNT:TNB   | NIBJUF   | 3.915 | 15.532 | 0.449 | -3.547  | 1.564 | 1.676 | 1.640 |
| 29 | ABA:TNT   | URILUD   | 3.395 | 8.767  | 0.488 | -6.917  | 1.564 | 1.362 | 1.594 |
| 30 | MACIC:TZM | ACERAD   | 3.075 | 5.538  | 0.530 | -5.505  | 1.622 | 1.448 | 1.605 |
| 31 | DHDS:TZM  | ACETEJ   | 3.690 | 6.970  | 0.503 | -39.198 | 1.821 | 1.622 | 1.625 |
| 32 | DNBZA:NA  | AWUDEB   | 3.440 | 9.204  | 0.491 | -16.189 | 1.683 | 1.473 | 1.607 |
| 33 | MBD:MTNB  | DIFZOK   | 3.115 | 9.764  | 0.475 | -5.664  | 1.564 | 1.148 | 1.522 |
| 34 | PM:UREA   | EFOZAB03 | 3.890 | 3.799  | 0.553 | -23.672 | 1.589 | 1.335 | 1.644 |
| 35 | MC:PC     | FIXROV01 | 3.050 | 7.521  | 0.578 | -17.990 | 1.711 | 1.470 | 1.606 |
| 36 | AB:MTNB   | FONHOH   | 3.005 | 11.972 | 0.426 | -6.309  | 1.564 | 1.250 | 1.442 |
| 37 | NDT:THTZT | FOYSUJ   | 3.055 | 7.189  | 0.521 | -22.546 | 1.577 | 1.919 | 1.664 |
| 38 | IDT:NTZ   | FUFSOQ   | 3.500 | 8.734  | 0.544 | -11.249 | 1.542 | 1.797 | 1.644 |
| 39 | DNBA:BA   | GAUTAM15 | 3.255 | 8.004  | 0.493 | -22.893 | 1.683 | 1.040 | 1.697 |
| 40 | PZ:OA     | GUDSUV   | 3.610 | 4.676  | 0.594 | -17.531 | 1.252 | 1.653 | 1.609 |
| 41 | TNP:MDNI  | HARJOB   | 3.865 | 11.143 | 0.500 | -8.721  | 1.760 | 1.637 | 1.769 |
| 42 | DNBA:TA   | IJAKAH   | 3.255 | 8.744  | 0.509 | -36.695 | 1.673 | 1.544 | 1.635 |
| 43 | NMI:NMI   | ITIXUE   | 3.230 | 5.235  | 0.564 | -16.332 | 1.660 | 1.660 | 1.660 |
| 44 | AN:HP     | JOZZED   | 4.225 | 3.923  | 0.661 | -2.994  | 1.494 | 1.130 | 1.614 |
| 45 | NF:CA     | LEWTAK   | 3.710 | 8.966  | 0.516 | -3.523  | 1.642 | 1.542 | 1.627 |
| 46 | NF:UREA   | ORUXUV   | 3.710 | 5.487  | 0.597 | -5.895  | 1.642 | 1.335 | 1.661 |

|    |             |        |       |        |       |         |       |       |       |
|----|-------------|--------|-------|--------|-------|---------|-------|-------|-------|
| 47 | NPO:PA      | OWIYEZ | 3.755 | 11.283 | 0.474 | -72.061 | 1.771 | 1.551 | 1.682 |
| 48 | UREA:CA     | PANVUV | 3.945 | 5.265  | 0.527 | -29.511 | 1.818 | 1.319 | 1.672 |
| 49 | PZCX:DHXBED | PAQNOM | 3.505 | 5.901  | 0.574 | -16.919 | 1.441 | 1.906 | 1.628 |
| 50 | DNPA:ODADA  | QARQUY | 3.430 | 8.233  | 0.516 | -8.733  | 1.900 | 1.608 | 1.775 |
| 51 | TNP:TAD     | QONYUP | 2.870 | 9.880  | 0.509 | -18.529 | 1.345 | 1.771 | 1.685 |
| 52 | IZO:DLTA    | RUWPEG | 3.540 | 7.075  | 0.490 | -9.258  | 1.863 | 1.637 | 1.656 |
| 53 | IZO:LTA     | UHACIQ | 3.590 | 5.519  | 0.455 | -33.493 | 1.760 | 1.496 | 1.631 |
| 54 | IZO:LTA     | UHAFEP | 3.590 | 5.338  | 0.453 | -27.322 | 1.760 | 1.496 | 1.607 |
| 55 | DNBZA:TZ    | UNAWUD | 3.170 | 7.800  | 0.464 | -27.865 | 1.688 | 1.274 | 1.640 |
| 56 | Urea:OA     | UROXAM | 4.530 | 3.099  | 0.589 | -28.110 | 1.391 | 1.653 | 1.679 |
| 57 | PZCX:OA     | UZODUK | 3.910 | 6.013  | 0.574 | -31.306 | 1.301 | 1.653 | 1.628 |
| 58 | TZA:NDTZI   | VAZBIJ | 3.175 | 6.290  | 0.581 | -12.882 | 1.867 | 1.711 | 1.790 |
| 59 | TZTM:HP     | YAFFUJ | 4.445 | 3.335  | 0.639 | -5.759  | 1.578 | 1.130 | 1.636 |
| 60 | BM:TNP      | YUQHEY | 3.370 | 9.626  | 0.511 | -23.115 | 1.771 | 1.341 | 1.632 |

<sup>a</sup>All energies are in  $\text{kJ}\cdot\text{mol}^{-1}$ , and the density are  $\text{g}\cdot\text{cm}^{-3}$

Table S3 the calculation values of the application parameters of 60 organic cocrystals in surface electrostatic potential correction model<sup>a</sup>

| No | Co-formers     | Refcode | M       | V <sub>m</sub> | M/V <sub>m</sub> | $u\sigma_{\text{tot}}^2$ |
|----|----------------|---------|---------|----------------|------------------|--------------------------|
| 1  | CL-20:TNT      | IZUZUZ  | 665.317 | 494.381        | 1.346            | 42.877                   |
| 2  | CL-20:DNG      | JABYOD  | 630.359 | 487.270        | 1.294            | 71.885                   |
| 3  | CL-20:MTNP     | QAPNAZ  | 655.282 | 475.234        | 1.379            | 28.317                   |
| 4  | CL-20:AZ2      | TETTAQ  | 672.320 | 492.017        | 1.366            | 45.318                   |
| 5  | CL-20:NEX-1    | WEPGEG  | 611.273 | 442.439        | 1.382            | 51.585                   |
| 6  | CL-20:GTA      | XAQFUS  | 640.390 | 512.960        | 1.248            | 52.013                   |
| 7  | CL-2:TODAAZ    | HIVGAW  | 657.305 | 477.701        | 1.376            | 26.430                   |
| 8  | CL-20:NFQN     | ROSMIX  | 596.341 | 453.807        | 1.314            | 32.426                   |
| 9  | CL-20:BQN      | ROSMOD  | 546.281 | 407.602        | 1.340            | 28.135                   |
| 10 | CL-20:DNB      | TIVJUF  | 606.293 | 447.782        | 1.354            | 38.624                   |
| 11 | CL-20:4,5-MDNI | NILCIX  | 610.285 | 456.074        | 1.338            | 51.220                   |
| 12 | HMX:PNO        | WEPTAP  | 391.256 | 326.290        | 1.199            | 59.024                   |
| 13 | HMX:FA         | ZEZHET  | 407.274 | 331.698        | 1.228            | 79.057                   |
| 14 | HMX:PDCA       | ZEZGOC  | 438.312 | 367.847        | 1.192            | 72.889                   |
| 15 | BTF:TNA        | ZEVNUL  | 444.189 | 325.019        | 1.367            | 42.638                   |
| 16 | BTF:TNB        | GEXMED  | 465.207 | 350.830        | 1.326            | 27.475                   |
| 17 | BTF:MATNB      | GEXMON  | 494.248 | 379.013        | 1.304            | 44.083                   |
| 18 | BTF:TNA        | GEXMIH  | 480.222 | 363.992        | 1.319            | 36.075                   |
| 19 | TNT: NNAP      | TOZMUS  | 400.302 | 349.462        | 1.145            | 37.773                   |
| 20 | TNT:1-BN       | URIJAH  | 434.201 | 347.532        | 1.249            | 31.624                   |



|    |           |          |         |         |       |         |
|----|-----------|----------|---------|---------|-------|---------|
| 21 | TNT:Ant   | URIJEL   | 404.357 | 369.656 | 1.094 | 26.991  |
| 22 | TNT:9-BN  | URIJIP   | 484.261 | 395.686 | 1.224 | 31.301  |
| 23 | TNT:Per   | URIJUB   | 467.352 | 435.783 | 1.072 | 26.575  |
| 24 | TNT:T2    | URIKEM   | 335.289 | 309.591 | 1.083 | 33.081  |
| 25 | TNT:DMDBT | URIKUC   | 431.363 | 401.162 | 1.075 | 26.426  |
| 26 | TNT:PDA   | URILAJ   | 341.275 | 299.556 | 1.139 | 43.138  |
| 27 | TNT:DMB   | URILEN   | 365.297 | 328.383 | 1.112 | 26.551  |
| 28 | TNT:TNB   | NIBJUF   | 440.236 | 350.818 | 1.255 | 27.936  |
| 29 | ABA:TNT   | URILUD   | 364.269 | 316.820 | 1.150 | 43.636  |
| 30 | MACIC:TZM | ACERAD   | 378.308 | 337.922 | 1.120 | 79.727  |
| 31 | DHDS:TZM  | ACETEJ   | 344.239 | 298.148 | 1.155 | 91.560  |
| 32 | DNBZA:NA  | AWUDEB   | 335.227 | 292.450 | 1.146 | 47.423  |
| 33 | MBD:MTNB  | DIFZOK   | 349.302 | 314.464 | 1.111 | 37.573  |
| 34 | PM:UREA   | EFOZAB03 | 188.142 | 177.199 | 1.062 | 112.646 |
| 35 | MC:PC     | FIXROV01 | 460.393 | 413.366 | 1.114 | 77.310  |
| 36 | AB:MTNB   | FONHOH   | 578.582 | 558.455 | 1.036 | 42.179  |
| 37 | NDT:THTZT | FOYSUJ   | 256.185 | 221.151 | 1.158 | 119.776 |
| 38 | IDT:NTZ   | FUFSOQ   | 315.205 | 270.372 | 1.166 | 85.818  |
| 39 | DNBA:BA   | GAUTAM15 | 377.308 | 353.839 | 1.066 | 67.940  |
| 40 | PZ:OA     | GUDSUV   | 170.123 | 157.037 | 1.083 | 73.612  |
| 41 | TNP:MDNI  | HARJOB   | 401.203 | 323.240 | 1.241 | 58.591  |
| 42 | DNBA:TA   | IJAKAH   | 296.198 | 256.505 | 1.155 | 116.112 |
| 43 | NMI:NMI   | ITIXUE   | 286.203 | 250.608 | 1.142 | 122.746 |

|    |             |        |         |         |       |         |
|----|-------------|--------|---------|---------|-------|---------|
| 44 | AN:HP       | JOZZED | 169.143 | 156.496 | 1.081 | 81.846  |
| 45 | NF:CA       | LEWTAK | 430.281 | 368.545 | 1.168 | 70.276  |
| 46 | NF:UREA     | ORUXUV | 298.214 | 261.793 | 1.139 | 168.265 |
| 47 | NPO:PA      | OWIYEZ | 369.201 | 299.918 | 1.231 | 49.926  |
| 48 | UREA:CA     | PANVUV | 189.130 | 164.253 | 1.151 | 125.835 |
| 49 | PZCX:DHXBED | PAQNOM | 237.170 | 209.957 | 1.130 | 111.549 |
| 50 | DNPA:ODADA  | QARQUY | 273.168 | 228.040 | 1.198 | 80.010  |
| 51 | TNP:TAD     | QONYUP | 369.293 | 319.139 | 1.157 | 60.385  |
| 52 | IZO:DLTA    | RUWPEG | 310.217 | 271.487 | 1.143 | 75.169  |
| 53 | IZO:LTA     | UHACIQ | 236.179 | 211.730 | 1.115 | 81.321  |
| 54 | IZO:LTA     | UHAFEP | 236.179 | 213.956 | 1.104 | 129.745 |
| 55 | DNBZA:TZ    | UNAWUD | 281.183 | 239.904 | 1.172 | 99.303  |
| 56 | Urea:OA     | UROXAM | 150.089 | 133.287 | 1.126 | 199.894 |
| 57 | PZCX:OA     | UZODUK | 213.148 | 194.640 | 1.095 | 116.026 |
| 58 | TZA:NDTZI   | VAZBIJ | 215.137 | 181.666 | 1.184 | 103.862 |
| 59 | TZTM:HP     | YAFFUJ | 160.136 | 149.606 | 1.070 | 72.411  |
| 60 | BM:TNP      | YUQHEY | 350.242 | 303.406 | 1.154 | 59.682  |

<sup>a</sup>*M* are in g·mol<sup>-1</sup>, the *V<sub>m</sub>* are in Å<sup>3</sup> and the *υσ<sub>tot</sub>*<sup>2</sup> are in (kcal·mol)<sup>2</sup>
